# Supplementary material
Source: PubMed Central journal article supplement (PMC8969032)
Supplement: kiab606_supplementary_data.pdf [file kiab606_supplementary_data.pdf]

## Supplemental Data

### Altered flavonoid and lignin profiles in rice mutants deficient in *CHS*, *CHI*, and *CHIL* genes

Pui Ying Lam,<sup>1†</sup> Lanxiang Wang,<sup>2†§</sup> Andy C. W. Lui,<sup>2</sup> Hongjia Liu,<sup>3</sup>  
Yuri Takeda-Kimura,<sup>1¶</sup> Mo-Xian Chen,<sup>4</sup> Fu-Yuan Zhu,<sup>5</sup> Jianhua Zhang,<sup>6</sup>  
Toshiaki Umezawa,<sup>1,7</sup> Yuki Tobimatsu,<sup>1‡</sup> Clive Lo<sup>2‡</sup>

<sup>1</sup>Research Institute for Sustainable Humanosphere, Kyoto University, Gokasho, Uji, Kyoto 611-0011, Japan; <sup>2</sup>School of Biological Sciences, The University of Hong Kong, Pokfulam, Hong Kong, China; <sup>3</sup>State Key Laboratory Breeding Base for Zhejiang Sustainable Pest and Disease Control, Institute of Crops and Nuclear Technology Utilization, Zhejiang Academy of Agricultural Sciences, Hangzhou 310021, China; <sup>4</sup>Shenzhen Research Institute, The Chinese University of Hong Kong, Shenzhen, China; <sup>5</sup>Co-Innovation Center for Sustainable Forestry in Southern China, College of Biology and the Environment, Nanjing Forestry University, Nanjing 210037, Jiangsu Province, China; <sup>6</sup>Department of Biology, Hong Kong Baptist University, Hong Kong, China and State Key Laboratory of Agrobiotechnology, The Chinese University of Hong Kong, Hong Kong, China; <sup>7</sup>Realization of Sustainable Society, Kyoto University, Kyoto University, Gokasho, Uji, Kyoto 611-0011, Japan.; <sup>†</sup>Co-first author; <sup>‡</sup>Senior authors. <sup>§</sup>Present address: Shenzhen Institute of Synthetic Biology, Shenzhen Institutes of Advanced Technology, Chinese Academy of Sciences, Shenzhen 518055, China; <sup>¶</sup>Present address: Department of Botany, University of Wisconsin-Madison, 430 Lincoln Drive, Madison, WI 53706, USA.

<sup>‡</sup>Senior Authors:

Yuki Tobimatsu (ytobimatsu@rish.kyoto-u.ac.jp; +81-774-38-3626), and  
Clive Lo (clivelo@hku.hk; +852-2299-0337)

## List of Materials

|                               |                                                                                                                                    |
|-------------------------------|------------------------------------------------------------------------------------------------------------------------------------|
| <b>Supplemental Fig. S1.</b>  | Predicted effects of mutations on OsCHI in <i>OsCHI</i> -CRISPR mutant lines.                                                      |
| <b>Supplemental Fig. S2.</b>  | Predicted effects of mutations on OsCHIL1 and OsCHIL2 in <i>OsCHIL</i> -CRISPR mutant lines.                                       |
| <b>Supplemental Fig. S3.</b>  | Phenotypes of <i>OsCHI</i> -CRISPR and wild-type control lines.                                                                    |
| <b>Supplemental Fig. S4.</b>  | CHI catalytic activities of crude proteins of <i>OsCHI</i> -CRISPR, <i>OsCHIL</i> -CRISPR and wild-type control lines.             |
| <b>Supplemental Table S1.</b> | Off target analysis of T <sub>3</sub> generation of <i>OsCHI</i> -CRISPR and <i>OsCHIL</i> -CRISPR mutant lines.                   |
| <b>Supplemental Table S2.</b> | Klason lignin assay of <i>OsCHI</i> -CRISPR-b, <i>OsCHIL</i> -CRISPR-b and wild-type control line.                                 |
| <b>Supplemental Table S3.</b> | Cell wall polysaccharide analysis of <i>OsCHS1</i> -TDNA, <i>OsCHI</i> -CRISPR, <i>OsCHIL</i> -CRISPR and wild-type control lines. |
| <b>Supplemental Table S4.</b> | Primers used in this study.                                                                                                        |

| >OsCHI                 |                                                                                                                                    |     |  |
|------------------------|------------------------------------------------------------------------------------------------------------------------------------|-----|--|
| WT                     | MAAVSEVEVDGVVFPVVARPPGSGHAHFLAGAGLFFVFCVPCQWRSGNAVQANLLAGLI                                                                        | 60  |  |
| <i>OsCHI</i> -CRISPR-a | MAAVSEVEVDGVVFPVVARPPGSGHAHFLAGAGLFFVFCVPCQWRSGNAVQANLLAGLI                                                                        | 60  |  |
| <i>OsCHI</i> -CRISPR-b | MAAVSEVEVDGVVFPVVARPPGSGHAHFLAGAGLFFVFCVPCQWRSGNAVQANLLAGLI                                                                        | 60  |  |
|                        |                                                                                                                                    |     |  |
| WT                     | DPSCRCEGSGDRRQLHQVHGHRVPGGGRGRAGAGQEVGRQVRRRARRRRRLLPRRRHRR                                                                        | 120 |  |
| <i>OsCHI</i> -CRISPR-a | DPSCRCEGSGDRRQLHQVHGHRVPGGGRGRAGAGQEVGRQVRRRARRRRRLLPRRRHRR                                                                        | 120 |  |
| <i>OsCHI</i> -CRISPR-b | DPSCRCEGSGDRRQLHQVHGHRVPGGGRGRAGAGQEVGRQVRRRARRRRRLLPRRRHRR                                                                        | 120 |  |
|                        |                                                                                                                                    |     |  |
| WT                     | FREVHEGDDDDPAHRRAVLGQGDGELRRGVEGRRRVHGRRGRGRGQVQGGQLQAPQLPSGR                                                                      | 180 |  |
| <i>OsCHI</i> -CRISPR-a | FREVHEGDDDDPAHRRAVLGT <b>TR</b> * <b>RRTASR-RGRPPACTRTTPRARP</b> -- <b>RTSSRRPSSPTAS</b>                                           | 176 |  |
| <i>OsCHI</i> -CRISPR-b | FREVHEGDDDDPAHRRAVLGT <b>TR</b> * <b>RRTASR-RGRPPACTRTTPRARP</b> -- <b>RTSSRRPSSPTAS</b>                                           | 176 |  |
|                        |                                                                                                                                    |     |  |
| WT                     | V--H---PLHPLPARR---PHRRVLQGLVGARGRRGGGGDREQCALRGGAGFHRRARG                                                                         | 231 |  |
| <i>OsCHI</i> -CRISPR-a | <b>LRARPSSSPTPRPASSPSRSPTRTRRCQRAPWRRRRSRTGRSARRCWI</b> PSSASTGSRRRS                                                               | 236 |  |
| <i>OsCHI</i> -CRISPR-b | <b>LRARPSSSPTPRPASSPSRSPTRTRRCQRAPWRRRRSRTGRSARRCWI</b> PSSASTGSRRRS                                                               | 236 |  |
|                        |                                                                                                                                    |     |  |
| WT                     | LAGGEAEHSGPRLAEPGGIHRRRGGGGARAGVVRVKIELRINRASKSSSYTSTLLLPSC                                                                        | 291 |  |
| <i>OsCHI</i> -CRISPR-a | <b>GA</b> * <b>R</b> PASRS <b>S</b> * <b>RRN</b> -PPATW-RRRSPRRC <b>P</b> RENRAAN* <b>PRI</b> * <b>E</b> LLHFLYT <b>S</b> TALVFDNE | 290 |  |
| <i>OsCHI</i> -CRISPR-b | <b>GA</b> * <b>R</b> PASRS <b>S</b> * <b>RRN</b> -PPATW-RRRSPRRC <b>P</b> RENRAAN* <b>PRI</b> * <b>E</b> LLHFLYT <b>S</b> TALVFDNE | 290 |  |
|                        |                                                                                                                                    |     |  |
| WT                     | LTMK*                                                                                                                              | 295 |  |
| <i>OsCHI</i> -CRISPR-a | I----                                                                                                                              | 291 |  |
| <i>OsCHI</i> -CRISPR-b | I----                                                                                                                              | 291 |  |

**Supplemental Fig. S1.** Predicted effects of mutations on OsCHI in *OsCHI*-CRISPR mutant lines.

Protein sequence alignment of wild-type OsCHI and the mutated OsCHI in *OsCHI*-CRISPR-a and *OsCHI*-CRISPR-b. If translation starts using the native start codon, frame shift mutation occurs in *OsCHI*-CRISPR-a and *OsCHI*-CRISPR-b, leading to the formation of a premature stop codon. If translation starts using the in frame start codon after the mutation site, the region before the start codon is missing.

Asterisks, stop codons. In red, the first premature stop codon. In blue, protein sequence different with wild-type OsCHI if translation starts using the native start codon. In purple, in frame start codon after the mutation site.

**A**

>OsCHIL1

|                         |                                                                        |     |
|-------------------------|------------------------------------------------------------------------|-----|
| WT                      | MYCAVGTEIATVEVEGIPFPQEI TVSK----PLSL-LANGI-----TDIEIHFLQIK             | 47  |
| <i>OsCHIL</i> -CRISPR-a | MYCAVGTEIATVEVEGIPF <b>HSGDNRQ</b> *AIVTAC*WHHRH*DPFPSDQIQRRHGV*S*KGQC | 56  |
| <i>OsCHIL</i> -CRISPR-b | MYCAVGTEIATVEVEGIPF <b>LRR</b> *PSVS----HCHCLLMASQ-----TLRSISFR-SN     | 46  |
|                         |                                                                        |     |
| WT                      | YNAIGVYLEKD-----NVLAHLESWKGKKA-----                                    | 73  |
| <i>OsCHIL</i> -CRISPR-a | ASAFGELEGQEGRGACAGLMASFRP*FLLRWRNC*G*W*SRRSKDHNTACSWRVQCVTVS           | 112 |
| <i>OsCHIL</i> -CRISPR-b | TTPSGCILKRT-----M---C*RIWRVGRARRPRSLCRRWLLSGPSF                        | 84  |
|                         |                                                                        |     |
| WT                      | ----ELVQDDGFFQ--ALVSAPVEKL--LRIVVIKEIKGSQYGVQLESSVRDRLVSVDK            | 124 |
| <i>OsCHIL</i> -CRISPR-a | CQ*TS-----TRRMKKRLWRRSPNSFSP-----                                      | 134 |
| <i>OsCHIL</i> -CRISPR-b | CSGGEIVEDSGDQDQRITIRRAAGEFSA*PSRVSRQVRG---G*RRSGEGHRILSVQV             | 139 |
|                         |                                                                        |     |
| WT                      | YEEDEEEALEKVTEFFQSKYFKPNSVITFHFPPTPGIAEISFVTEGKGE-----                 | 173 |
| <i>OsCHIL</i> -CRISPR-a | ---SI---S-----SPTPSSPSTFLPPELQRYHL*QKARARRS*QWRTRMWPR*                 | 175 |
| <i>OsCHIL</i> -CRISPR-b | FQAQLRHH-----LPLSYHPWNCR--DIICDRRQGRGE-----                            | 170 |
|                         |                                                                        |     |
| WT                      | AKLT--VEN-KNVA <b>MI</b> QKWYLGGESAVSPTTVKSLADQFAALLSA*                | 216 |
| <i>OsCHIL</i> -CRISPR-a | FRSGTWENLQFLRRL*RAWQINSQHCSLH-----                                     | 204 |
| <i>OsCHIL</i> -CRISPR-b | ADSGEQECG-RDDSEVVPGWIRICFSDDCEEPGRSIRSTALCM----                        | 212 |

**B**

>OsCHIL2

|                         |                                                                      |     |
|-------------------------|----------------------------------------------------------------------|-----|
| WT                      | MATVEVEGIPFPQEI TVSKPLSLLAHGITDIEIHFLQIKY-----NAIGVYLEKDNVL          | 53  |
| <i>OsCHIL</i> -CRISPR-a | MATVEVEGIPF <b>LSGDHRQ</b> *AVI-----TASFWHYRH*DSFPSDQIQRRHGV-S*KGQCT | 50  |
| <i>OsCHIL</i> -CRISPR-b | MATVE-----                                                           | 5   |
|                         |                                                                      |     |
| WT                      | GHLESWKGKKAEEELVQDDGFFQALVSAPVEKLFRIVVIKEIKGSQYGVQLE-----SSVR        | 108 |
| <i>OsCHIL</i> -CRISPR-a | RAFGELEGQEGRGACAGMMASF-----RP*FL-LLWRNYSGSW*SRRSKDHSTACSWR           | 100 |
| <i>OsCHIL</i> -CRISPR-b | -----VEGIPFLMASF-----RP*FL-LLWRNYSGSW*SRRSKDHSTACSWR                 | 44  |
|                         |                                                                      |     |
| WT                      | DRLVSVD-----KY---EDEEEESLEKVTEFFQSKYFKPNSVITFHFPNTPGI                | 153 |
| <i>OsCHIL</i> -CRISPR-a | AQCATVSCQWTSTRMRKSLWRR*LNSFSPSISPTPSSPSTFLTPELQRYHL*QKARA            | 158 |
| <i>OsCHIL</i> -CRISPR-b | AQCATVSCQWTSTRMRKSLWRR*LNSFSPSISPTPSSPSTFLTPELQRYHL*QKARA            | 102 |
|                         |                                                                      |     |
| WT                      | AEI-SFVTEG---KGEAKLTVEN-KNVA <b>MI</b> QKWYLGGESAVSPTTVKSLADQFAALLSA | 208 |
| <i>OsCHIL</i> -CRISPR-a | RRS*QWRTRMWPR*FRSGTWENLQFLRRL*RAWQINSQHCSLH-----                     | 199 |
| <i>OsCHIL</i> -CRISPR-b | RRS*QWRTRMWPR*FRSGTWENLQFLRRL*RAWQINSQHCSLH-----                     | 143 |
|                         |                                                                      |     |
| WT                      | * 208                                                                |     |
| <i>OsCHIL</i> -CRISPR-a | - 199                                                                |     |
| <i>OsCHIL</i> -CRISPR-b | - 143                                                                |     |

**Supplemental Fig. S2.** Predicted effects of mutations on OsCHIL1 and OsCHIL2 in *OsCHIL*-CRISPR mutant lines.

A, Protein sequence alignment of wild-type OsCHIL1 and the mutated OsCHIL1 in *OsCHIL*-CRISPR-a and *OsCHIL*-CRISPR-b.

B, Protein sequence alignment of wild-type OsCHIL2 and the mutated OsCHIL2 in *OsCHIL*-CRISPR-a and *OsCHIL*-CRISPR-b.

If translation starts using the native start codon, frame shift mutation occurs in *OsCHIL*-CRISPR-a and *OsCHIL*-CRISPR-b, leading to the formation of a premature stop codon. If translation starts using the in frame start codon after the mutation site, the region before the start codon is missing.

Asterisks, stop codons. In blue, protein sequence different with wild-type OsCHIL1 (A) or OsCHIL2 (B) if translation starts using the native start codon. In red, the first premature stop codon. In purple, in frame start codon after the mutation site.

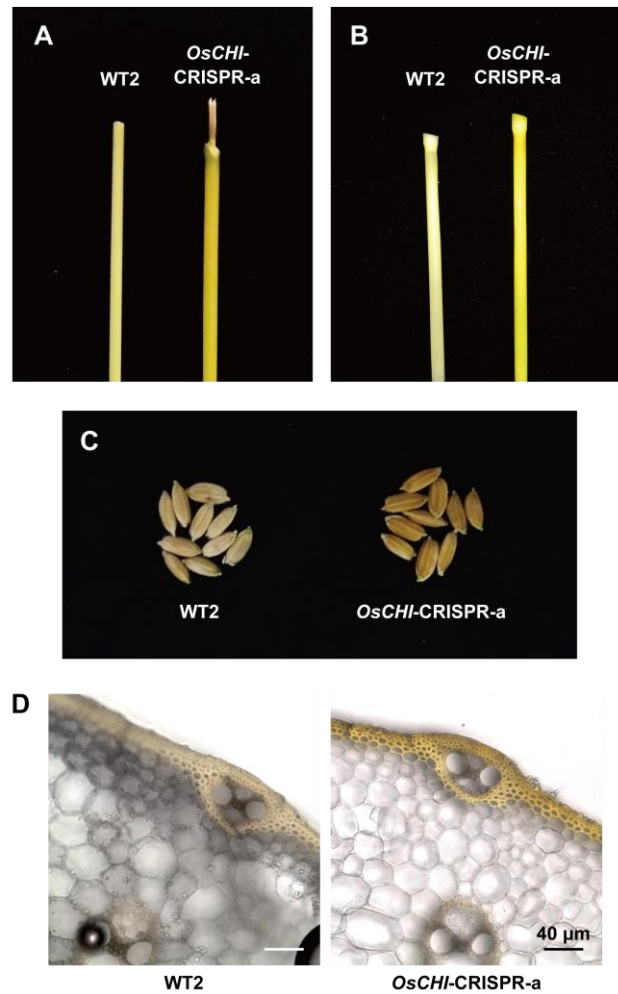

**Supplemental Fig. S3.** Phenotypes of *OsCHI*-CRISPR and wild-type control lines.

A and B, Mature culm tissues of WT2 and *OsCHI*-CRISPR-a without any treatment (A), and after fixation and solvent extraction (B). Culm of *OsCHI*-CRISPR-a appears to be yellow.

C, Rice grains of WT2 and *OsCHI*-CRISPR-a. Spikelets of *OsCHI*-CRISPR-a appear to be yellow.

D, Transverse sections of culm tissues of WT2 and *OsCHI*-CRISPR-a after fixation and solvent extraction and before subjecting to any staining. The secondary cell walls of the vascular bundles and cortical sclerenchyma fibers in *OsCHI*-CRISPR-a appear to be yellow.

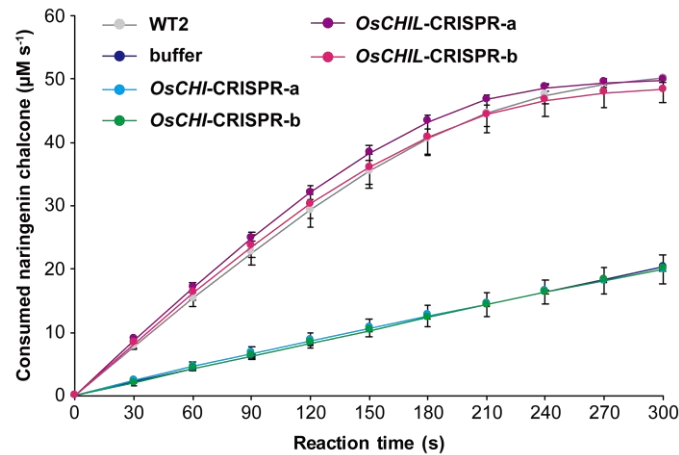

**Supplemental Fig. S4.** CHI catalytic activities of crude proteins of *OsCHI*-CRISPR, *OsCHIL*-CRISPR and their isogenic wild type.

Crude proteins extracted from wild-type control (WT2), *OsCHI*-CRISPR and *OsCHIL*-CRISPR mutants were used to perform CHI enzyme assay with naringenin chalcone as a substrate. Crude proteins of WT2 and *OsCHIL*-CRISPR mutant lines could rapidly consume naringenin chalcone. Crude proteins of *OsCHI*-CRISPR mutant lines harbored similar CHI activities with that of spontaneous isomerization occurred in reaction mixtures that only contained extraction buffer. These results suggest that *OsCHIL*s unlikely harbor CHI catalytic activities nor serve as enhancers of CHI.

Values refer to means  $\pm$  standard deviations from biologically independent plants ( $n = 3$ ).

**Supplemental Table S1.** Off target analysis of T<sub>3</sub> generation of *OsCHI*-CRISPR and *OsCHIL*-CRISPR mutant lines.

| sgRNA name | Off-target site name | Sequence (5' to 3') <sup>a</sup>                            | CRISPR-P off-target score | Location (Chromosome:start) | Gene locus            | Mutation |
|------------|----------------------|-------------------------------------------------------------|---------------------------|-----------------------------|-----------------------|----------|
| sgRNA-a    | Off-target-a1        | CGGC <b>AG</b> GCAGTACTCGGAC <b>G</b> <u>TGG</u>            | 0.8                       | Chr3:+19289                 | Exon (LOC_Os03g01018) | n.d.     |
|            | Off-target-a2        | CG <b>T</b> CG <b>CG</b> GAG <b>C</b> ACTCGGACAC <u>CGG</u> | 0.5                       | Chr3:+8809743               | Exon (LOC_Os03g15980) | n.d.     |
|            | Off-target-a3        | CGGG <b>CG</b> GAGTACTCG <b>T</b> ACAT <u>TGG</u>           | 0.4                       | Chr3:+31598624              | Exon (LOC_Os03g55530) | n.d.     |
| sgRNA-b    | Off-target-b1        | <b>GA</b> ACTC <b>C</b> ATCCCATTT <b>C</b> CTCAAG           | 0.8                       | Chr6:+15503611              | Exon (LOC_Os06g27380) | n.d.     |
|            | Off-target-b2        | GCAGGG <b>A</b> ATCCCATTT <b>C</b> AGC <u>AGG</u>           | 0.1                       | Chr1:+4971979               | Exon (LOC_Os01g09649) | n.d.     |
|            | Off-target-b3        | <b>AG</b> GGGG <b>C</b> ATCCCAT <b>T</b> GCCT <b>G</b> AAG  | 0.1                       | Chr3:-28010595              | Exon (LOC_Os03g49170) | n.d.     |
| sgRNA-c    | Off-target-c1        | G <b>C</b> <b>T</b> GTGCTTT <b>T</b> TGCAGGATGAGGG          | 1.3                       | Chr3:-563747                | Exon (LOC_Os03g01915) | n.d.     |
|            | Off-target-c2        | GAG <b>C</b> AGCT <b>A</b> GT <b>G</b> GAGGATGAAAG          | 0.6                       | Chr4:+218051                | Exon (LOC_Os04g01280) | n.d.     |
|            | Off-target-c3        | GAGG <b>C</b> GCTTGT <b>G</b> GAG <b>T</b> TGAT <u>TGG</u>  | 0.4                       | Chr6:-12412691              | Exon (LOC_Os06g21480) | n.d.     |

Top 3 off target sites predicted by CRISPR-P 2.0 (Liu et al., 2017) were sequenced.

<sup>a</sup>Bold: mismatch nucleotides compared with the sequence of sgRNA. Underlined: PAM sites.

n.d.: not detected.

#### Reference

Liu H, Ding Y, Zhou Y, Jun W, Xie K, Chen L-L (2017) CRISPR-P 2.0: an improved CRISPR-Cas9 tool for genome editing in plants. *Mol Plant* **10**: 530-532



**Supplemental Table S2.** Klason lignin assay of *OsCHI*-CRISPR-b, *OsCHIL*-CRISPR-b and wild-type control line.

|                          | WT2         | <i>OsCHI</i> -CRISPR-b | <i>OsCHIL</i> -CRISPR-b |
|--------------------------|-------------|------------------------|-------------------------|
| Klason lignin (mg/g CWR) | 120.4 ± 6.3 | 112.0 ± 9.8            | 126.0 ± 3.2             |

Values refer to means ± standard deviations from biologically independent plants (Student's *t*-test, *n* = 3).

**Supplemental Table S3.** Cell wall polysaccharide analysis of *OsCHS1*-TDNA, *OsCHI*-CRISPR-a, *OsCHIL*-CRISPR-a and their isogenic wild types.

|                               | WT1<br>(cv. Zhonghua 11) | <i>OsCHS1</i> -TDNA<br>(cv. Zhonghua 11) | WT2<br>(cv. Nipponbare) | <i>OsCHI</i> -CRISPR-a<br>(cv. Nipponbare) | <i>OsCHIL</i> -CRISPR-a<br>(cv. Nipponbare) |
|-------------------------------|--------------------------|------------------------------------------|-------------------------|--------------------------------------------|---------------------------------------------|
| Crystalline glucan (mg/g CWR) | 391.2 ± 5.6              | 381.3 ± 3.9                              | 376.9 ± 2.7             | 342.0 ± 11.7**                             | 381.1 ± 6.5                                 |
| Amorphous glucan (mg/g CWR)   | 44.8 ± 6.0               | 53.8 ± 5.2                               | 46.7 ± 1.1              | 52.9 ± 4.6                                 | 48.9 ± 2.6                                  |
| Arabinan (mg/g CWR)           | 38.1 ± 2.3               | 36.3 ± 2.5                               | 36.0 ± 2.3              | 39.0 ± 0.3                                 | 32.8 ± 1.6                                  |
| Xylan (mg/g CWR)              | 127.6 ± 15.6             | 129.5 ± 15.5                             | 108.2 ± 3.4             | 124.0 ± 6.9*                               | 112.6 ± 3.2                                 |
| Mannan (mg/g CWR)             | 2.4 ± 0.2                | 2.3 ± 0.1                                | 3.0 ± 0.2               | 3.3 ± 0.1                                  | 2.5 ± 0.1**                                 |
| Galactan (mg/g CWR)           | 18.2 ± 2.2               | 17.0 ± 1.4                               | 15.3 ± 1.6              | 16.5 ± 1.0                                 | 14.1 ± 0.9                                  |

Values refer to means ± standard deviations from biologically independent plants. Asterisks indicate significant differences between mutant line and its isogenic wild type (Student's *t*-test, *n* = 3, \*: *p* < 0.05, \*\*: *p* < 0.01). CWR, cell wall residue.

**Supplemental Table S4.** Primers used in this study.

| Primer name | Sequence (5' to 3')      | Target gene(s)                     | Purpose                                                                                              |
|-------------|--------------------------|------------------------------------|------------------------------------------------------------------------------------------------------|
| LL302-a-F   | GGCAGGAGGGCATCCCATTTCCTC | <i>OsCHIL1</i> &<br><i>OsCHIL2</i> | Construction of sgRNA-b in CRISPR/Cas9 binary vector used in the generation of <i>OsCHIL</i> -CRISPR |
| LL302-a-R   | AAACGAGGAAATGGGATGCCCTCC |                                    |                                                                                                      |
| LL302-b-F   | GCCGGAGGAGCTTGTGCAGGATGA |                                    | Construction of sgRNA-c in CRISPR/Cas9 binary vector used in the generation of <i>OsCHIL</i> -CRISPR |
| LL302-b-R   | AAACTCATCCTGCACAAGCTCCTC |                                    |                                                                                                      |
| CL2223      | ATGGTCGAGCTCAAGGAGAA     | <i>OsCHS1</i>                      | Left primer. Genotyping of <i>OsCHS1</i> -TDNA                                                       |
| CL2224      | CAAACCGTTGTCCTCTTTCC     |                                    | Right primer. Genotyping of <i>OsCHS1</i> -TDNA                                                      |
| CL2227      | AATCCAGATCCCCGAATTA      | T-DNA                              | Border primer. Genotyping of <i>OsCHS1</i> -TDNA                                                     |
| CL3988      | CGGAGTAATCGGCAACAACG     | <i>OsCHI</i>                       | Genotyping of <i>OsCHI</i> -CRISPR                                                                   |
| CL3989      | CATCAAGTTCACGGCCATCG     |                                    |                                                                                                      |
| CL4569      | TGATTGTTGTAAGTGCAGTGGG   | <i>OsCHIL1</i>                     | Genotyping of <i>OsCHIL</i> -CRISPR                                                                  |
| CL4570      | CCACACGTAAACATCATCAATCA  |                                    |                                                                                                      |
| CL4571      | TGGTAGTAGCTGCACACACA     | <i>OsCHIL2</i>                     | Genotyping of <i>OsCHIL</i> -CRISPR                                                                  |
| CL4572      | GAGCGGCAGACTGAACCTTA     |                                    |                                                                                                      |

**Supplemental Table S4.** Primers used in this study (continued).

| Primer name | Sequence (5' to 3')    | Target gene(s) | Purpose                   |
|-------------|------------------------|----------------|---------------------------|
| OsUBQ5-F    | ACCACTTCGACCGCCACTACT  | <i>OsUBQ5</i>  | RT-qPCR of <i>OsUBQ5</i>  |
| OsUBQ5-R    | ACGCCTAAGCCTGCTGGTT    |                |                           |
| OsCHS1-F    | ACCCGGACTACTACTTCAGGAT | <i>OsCHS1</i>  | RT-qPCR of <i>OsCHS1</i>  |
| OsCHS1-R    | TCTTCCTGATCTGCGACTTGT  |                |                           |
| OsCHS2-F    | CACCAACAGCGAGCACCTAA   | <i>OsCHS2</i>  | RT-qPCR of <i>OsCHS2</i>  |
| OsCHS2-R    | ACACGCACATGCTAGGGTTC   |                |                           |
| OsCHI-F     | CGCAGGTTTGTGGTGTGGTTC  | <i>OsCHI</i>   | RT-qPCR of <i>OsCHI</i>   |
| OsCHI-R     | CGGATCGATCAAACCAGCAAG  |                |                           |
| OsCHIL1-F   | GAGGATAGTGGTGATCAAGGAG | <i>OsCHIL1</i> | RT-qPCR of <i>OsCHIL1</i> |
| OsCHIL1-R   | CATCCTCCTCGTACTTGTCTAC |                |                           |
| OsCHIL2-F   | CCATGGCATTACAGACATTGAG | <i>OsCHIL2</i> | RT-qPCR of <i>OsCHIL2</i> |
| OsCHIL2-R   | GATCACCACGATCCTGAATAGT |                |                           |
